# Supplementary material
Source: PubMed Central journal article supplement (PMC1555634)
Supplement: nrs04021.sp1.pdf [file nrs04021.sp1.pdf]

**Calculation #1:**

$$\frac{\text{GFP}^2 \text{ emission (515nm)} - \text{GFP}^2 \text{ emission of non-transfected cells (515nm)}}{\text{Rluc emission (410 nm)} - \text{Rluc emission of non-transfected cells (410 nm)}} = \text{Corrected BRET}^2 \text{ Ratio}$$

**Calculation #2:**

Corrected BRET<sup>2</sup> Ratio – Correction Factor (Cf)

Where Cf =

$$\frac{\text{GFP}^2 \text{ emission (515nm)} - \text{GFP}^2 \text{ emission of non-transfected cells (515nm)}}{(\text{Rluc emission (410nm)} - \text{Rluc emission of non-transfected cells (410)})}$$

for the Rluc vector expressed with the empty GFP<sup>2</sup> vector
